# Supplementary material for: Impaired lysosomal activity mediated autophagic flux disruption by graphite carbon nanofibers induce apoptosis in human lung epithelial cells through oxidative stress and energetic impairment
Source: PubMed Central journal article supplement (PMC5408471; doi:10.1186/s12989-017-0194-4), 2017-04-28

**Figure S2**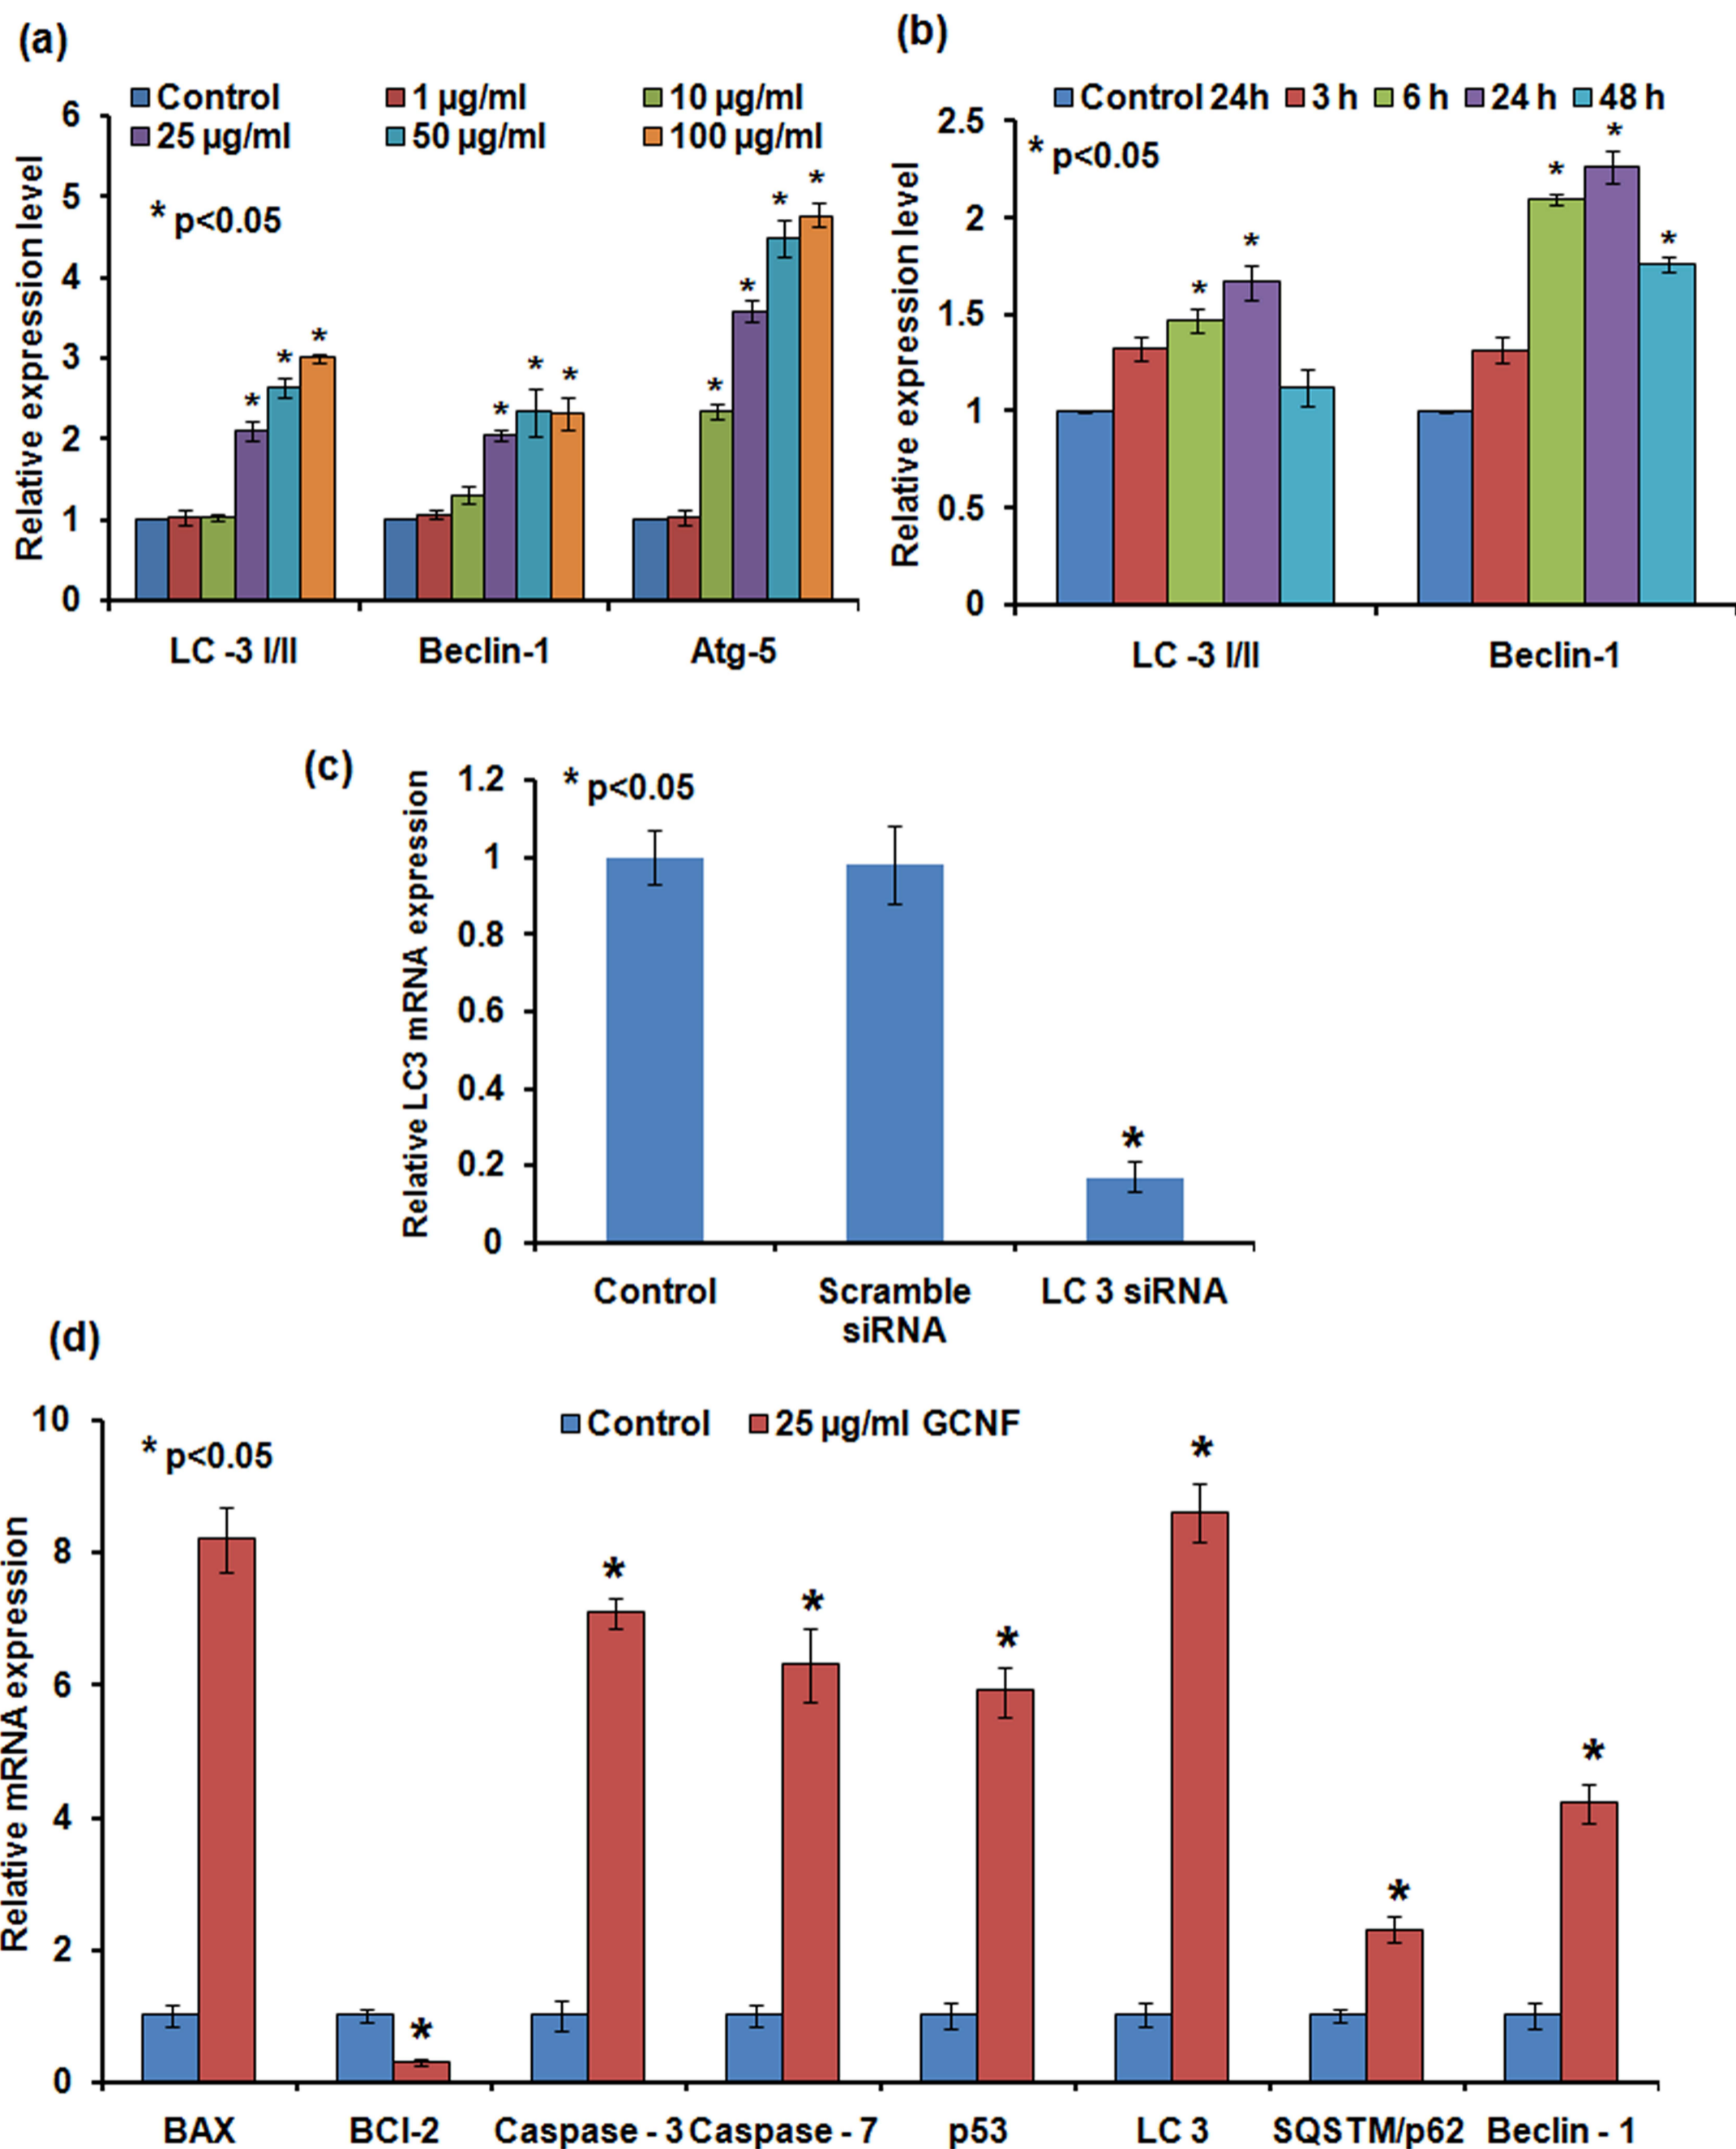

Supplement: 12989_2017_194_MOESM2_ESM.pdf [file 12989_2017_194_MOESM2_ESM.pdf]
